# Supplementary material
Source: HighWire-hosted journal article supplement (https://bmjopen.bmj.com/content/14/10/e082572)
Supplement: inline-supplementary-material-1 [file inline-supplementary-material-1.pdf]

Supplemental Materials

Index

Supplemental Table 1 ..... 2

Supplemental Table 2 ..... 3

Supplemental Table 3 ..... 4

Supplementary Table 1. Components of the intervention

| Component      | Description                                                                                                                                                                                                                                                                                                                                                                                                               |
|----------------|---------------------------------------------------------------------------------------------------------------------------------------------------------------------------------------------------------------------------------------------------------------------------------------------------------------------------------------------------------------------------------------------------------------------------|
| Breastfeeding  | <ul style="list-style-type: none"><li>• Breastfeed exclusively for up to six months of life</li><li>• Maintain partial breastfeeding thereafter for at least three additional months</li></ul>                                                                                                                                                                                                                            |
| Weight control | <ul style="list-style-type: none"><li>• Avoid weight gain in order to return to pre-pregnancy weight</li><li>• Those with excess weight gradually lose up to 5% of their body weight</li><li>• If this goal had been achieved at baseline, attempt a further 5% loss of current weight or achieve a BMI of 22.5 kg/m<sup>2</sup></li></ul>                                                                                |
| Healthy eating | <ul style="list-style-type: none"><li>• Avoid ultraprocessed and other high energy dense foods</li><li>• Increase food choices from a variety of less processed and nutritious foods</li></ul>                                                                                                                                                                                                                            |
| Being active   | <ul style="list-style-type: none"><li>• Decrease sedentary periods during the day</li><li>• Increase physical activity gradually with a goal of at least 150 minutes of moderate or 75 minutes of vigorous physical activity per week</li><li>• Include physical activity in leisure time, if possible, with the baby</li><li>• Include stretching and strength training and further efforts to improve fitness</li></ul> |

Supplementary Table 2. The core curriculum of telephone intervention.

| Part     | Session                                            | Focus                                                                                                |
|----------|----------------------------------------------------|------------------------------------------------------------------------------------------------------|
| <b>1</b> | <b>Planning healthy habits</b>                     |                                                                                                      |
|          | 1                                                  | Eating well, healthy diet                                                                            |
|          | 2                                                  | Reducing ultra-processed foods and other high-calory foods                                           |
|          | 3                                                  | Increasing nutritious and less caloric foods observing the whole variety of the less processed foods |
|          | 4                                                  | Purchasing planning, organization, new recipes, progress, and difficulties                           |
|          | 5                                                  | How to be more physically active                                                                     |
|          | 6                                                  | Physical activity plans                                                                              |
|          | 7                                                  | Energy balance: food and physical activity                                                           |
| <b>2</b> | <b>Detecting and solving problems</b>              |                                                                                                      |
|          | 8                                                  | Controlling stimuli that lead to overeating                                                          |
|          | 9                                                  | Planning how to solve problems encountered in the food or physical activity plan                     |
|          | 10                                                 | Making social stimuli positive for healthy plans                                                     |
|          | 11                                                 | Reflecting on negative thoughts against healthy plans                                                |
|          | 12                                                 | Managing stress                                                                                      |
|          | 13                                                 | The slippery path of lifestyle changes                                                               |
|          | 14                                                 | Increasing physical activity                                                                         |
| <b>3</b> | <b>Reviewing and or maintaining healthy habits</b> |                                                                                                      |
|          | 15                                                 | Review: How to adjust energy balance to lose weight                                                  |
|          | 16                                                 | Review: How to adjust energy balance to maintain weight                                              |
|          | 17                                                 | Dietary changes: What else can be improved?                                                          |
|          | 18                                                 | How to train to increase fitness                                                                     |
|          | 19                                                 | How to deal with everyday difficulties in adopting a healthy lifestyle                               |
|          | 20                                                 | How to keep on the path of change                                                                    |

Supplementary Table 3. Post hoc subgroup analysis of treatment effect on the incidence of diabetes. (N=466)

|                            | Group        | Incidence/100 PY | Hazard ratio     |
|----------------------------|--------------|------------------|------------------|
|                            |              | (95% CI)         | (95% CI)         |
| Overall                    | Control      | 13.2 (10.3-16.2) | 0.84 (0.60-1.19) |
|                            | Intervention | 11.5 (8.8-14.1)  |                  |
| Entry                      |              |                  |                  |
| Before March 2019          | Control      | 14.9 (11.4-18.5) | 0.71 (0.48-1.04) |
|                            | Intervention | 10.9 (8.0-13.9)  |                  |
| After March 2019           | Control      | 8.1 (2.9-13.2)   | 1.60 (0.72-3.56) |
|                            | Intervention | 13.0 (7.2-18.8)  |                  |
| < 6 months after birth     | Control      | 15.6 (10.6-20.6) | 0.61 (0.37-1.00) |
|                            | Intervention | 9.9 (6.4-13.4)   |                  |
| ≥ 6 months after birth     | Control      | 11.5 (8.0-15.0)  | 1.10 (0.69-1.76) |
|                            | Intervention | 13.2 (9.1-17.3)  |                  |
| Age (years)                |              |                  |                  |
| < 35                       | Control      | 13.3 (9.2-17.4)  | 0.86 (0.53-1.40) |
|                            | Intervention | 11.5 (7.6-15.4)  |                  |
| ≥35                        | Control      | 12.9 (8.7-17.1)  | 0.85 (0.52-1.38) |
|                            | Intervention | 11.7 (8.0-15.5)  |                  |
| BMI before pregnancy       |              |                  |                  |
| ≥ 30 kg/m <sup>2</sup>     | Control      | 18.0 (12.5-23.5) | 0.76 (0.48-1.20) |
|                            | Intervention | 14.6 (10.2-18.9) |                  |
| < 30 kg/m <sup>2</sup>     | Control      | 10.7 (7.3-14.1)  | 0.79 (0.47-1.32) |
|                            | Intervention | 8.6 (5.4-11.9)   |                  |
| Number of living children  |              |                  |                  |
| 1                          | Control      | 9.7 (5.0-14.4)   | 1.07 (0.53-2.14) |
|                            | Intervention | 10.8 (6.1-15.5)  |                  |
| 2                          | Control      | 13.6 (8.8-18.4)  | 0.73 (0.41-1.30) |
|                            | Intervention | 10.5 (6.3-14.8)  |                  |
| 3                          | Control      | 16.1 (10.6-21.5) | 0.79 (0.46-1.38) |
|                            | Intervention | 13.0 (8.0-19.1)  |                  |
| Insulin during pregnancy   |              |                  |                  |
| Yes                        | Control      | 14.0 (9.9-18.0)  | 0.74 (0.46-1.20) |
|                            | Intervention | 10.8 (7.2-14.5)  |                  |
| No                         | Control      | 12.3 (8.1-16.5)  | 0.98 (0.59-1.61) |
|                            | Intervention | 12.0 (8.1-16.0)  |                  |
| Family History of Diabetes |              |                  |                  |
| Yes                        | Control      | 13.4 (10.1-16.6) | 0.86 (0.59-1.61) |
|                            | Intervention | 11.8 (8.7-14.8)  |                  |
| No                         | Control      | 12.3 (5.5-19.0)  | 0.86 (0.38-1.94) |
|                            | Intervention | 10.9 (5.2-16.5)  |                  |
| Prediabetes at baseline    |              |                  |                  |
| Yes                        | Control      | 17.0 (12.9-21.1) | 0.88 (0.61-1.29) |
|                            | Intervention | 15.5 (11.6-19.3) |                  |
| No                         | Control      | 6.4 (2.9-9.9)    | 0.66 (0.27-1.62) |
|                            | Intervention | 4.3 (1.4-7.2)    |                  |

CI: Confidence interval; PY: person-years.
